# Supplementary material for: Neuropilin1 Expression Acts as a Prognostic Marker in Stomach Adenocarcinoma by Predicting the Infiltration of Treg Cells and M2 Macrophages
Source: PubMed Central journal article supplement (PMC7290937; doi:10.3390/jcm9051430), 2020-05-12
Supplement: jcm-09-01430-s001.pdf [file jcm-09-01430-s001.pdf]

**Supplementary Table S1. Tumor Abbreviations.**

| Abbreviation | Type of Cancer                                                   |
|--------------|------------------------------------------------------------------|
| ACC          | Adrenocortical carcinoma                                         |
| BLCA         | Bladder Urothelial Carcinoma                                     |
| BRCA         | Breast invasive carcinoma                                        |
| CESC         | Cervical squamous cell carcinoma and endocervical adenocarcinoma |
| CHOL         | Cholangio carcinoma                                              |
| COAD         | Colon adenocarcinoma                                             |
| DLBC         | Lymphoid Neoplasm Diffuse Large B-cell Lymphoma                  |
| ESCA         | Esophageal carcinoma                                             |
| GBM          | Glioblastoma multiforme                                          |
| HNSC         | Head and Neck squamous cell carcinoma                            |
| KICH         | Kidney Chromophobe                                               |
| KIRC         | Kidney renal clear cell carcinoma                                |
| KIRP         | Kidney renal papillary cell carcinoma                            |
| LAML         | Acute Myeloid Leukemia                                           |
| LGG          | Brain Lower Grade Glioma                                         |
| LIHC         | Liver hepatocellular carcinoma                                   |
| LUAD         | Lung squamous cell carcinoma                                     |
| MESO         | Mesothelioma                                                     |
| OV           | Ovarian serous cystadenocarcinoma                                |
| PAAD         | Pancreatic adenocarcinoma                                        |
| PCPG         | Pheochromocytoma and Paraganglioma                               |
| PRAD         | Prostate adenocarcinoma                                          |
| READ         | Rectum adenocarcinoma                                            |
| SARC         | Sarcoma                                                          |
| SKCM         | Skin Cutaneous Melanoma                                          |
| STAD         | Stomach adenocarcinoma                                           |
| TGCT         | Testicular Germ Cell Tumors                                      |
| THCA         | Thyroid carcinoma                                                |
| THYM         | Thymoma                                                          |
| UCEC         | Uterine Corpus Endometrial Carcinoma                             |
| UCS          | Uterine Carcinosarcoma                                           |
| UVM          | Uveal Melanoma                                                   |

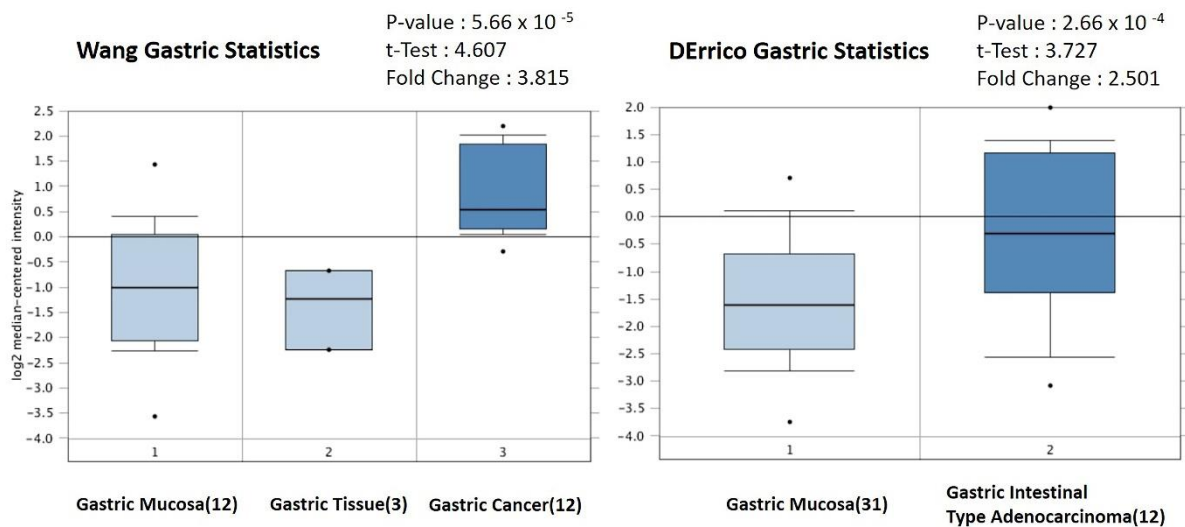

**Supplementary Figure S2. Overexpression of NRP1 mRNA in STAD from further Oncomine Analysis.**

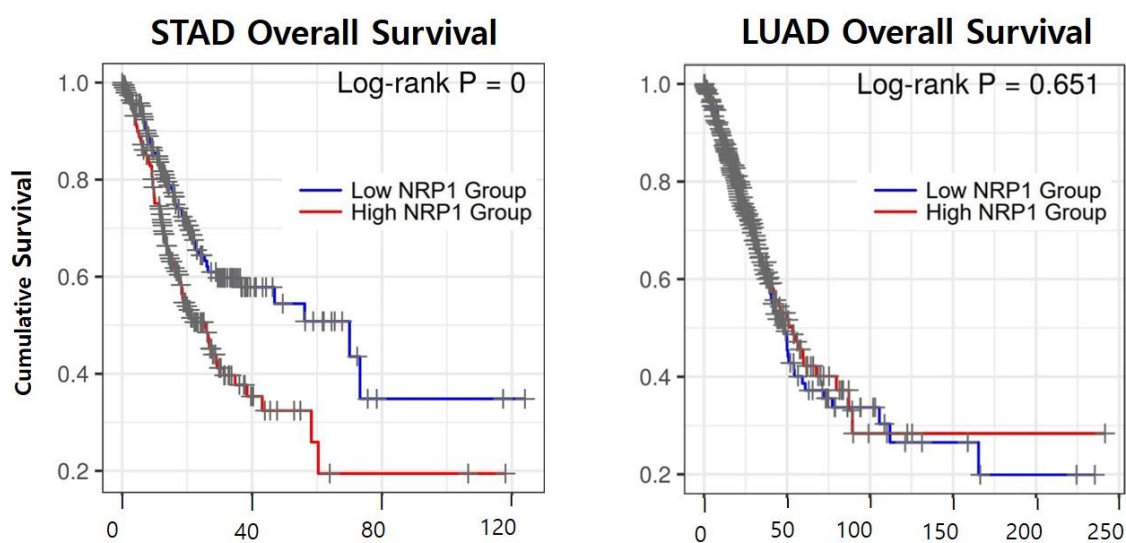

**Supplementary Figure S3.** The prognostic value of NRP1 using TIMER database.

**Supplementary Table S4.** Correlation analysis between NRP1 and gene markers of immune cells using Tumor-Gastric-Tan-192-fRMA-u133p2 dataset in R2: Genomics Analysis and Visualization platform (<http://r2.amc.nl>).

| Description             | Gene markers          | STAD   |       |
|-------------------------|-----------------------|--------|-------|
|                         |                       | r      | P     |
| T cell (general)        | <i>CD3D</i>           | 0.032  | 0.656 |
|                         | <i>CD3E</i>           | 0.234  | ***   |
|                         | <i>CD2</i>            | 0.239  | ***   |
| Treg cell               | <i>FOXP3</i>          | -0.296 | ***   |
|                         | <i>CCR8</i>           | -0.147 | 0.042 |
|                         | <i>STAT5B</i>         | 0.637  | ***   |
| TAM                     | <i>TGFβ (TGFB1)</i>   | 0.689  | ***   |
|                         | <i>CCL2</i>           | 0.722  | ***   |
|                         | <i>CD68</i>           | 0.163  | 0.024 |
| M1 Macrophage           | <i>IL10</i>           | 0.356  | ***   |
|                         | <i>INOS(NOS2)</i>     | -0.326 | ***   |
|                         | <i>IRF5</i>           | -0.161 | 0.026 |
| M2 Macrophage           | <i>COX2 (PTGS2)</i>   | 0.395  | ***   |
|                         | <i>CD163</i>          | 0.717  | ***   |
|                         | <i>VSIG4</i>          | 0.691  | ***   |
| CD8 <sup>+</sup> T cell | <i>MS4A4A</i>         | 0.727  | ***   |
|                         | <i>CD8A</i>           | 0.129  | 0.075 |
|                         | <i>CD8B</i>           | 0.004  | 0.957 |
| Neutrophil              | <i>CD66b(CEACAM8)</i> | -0.025 | 0.729 |
|                         | <i>CD11b (ITGAM)</i>  | 0.570  | ***   |
|                         | <i>CCR7</i>           | 0.058  | 0.421 |
| NK cell                 | <i>KIR2DL1</i>        | -0.474 | ***   |
|                         | <i>KIR2DL3</i>        | -0.480 | ***   |
|                         | <i>KIR2DL4</i>        | -0.396 | ***   |
|                         | <i>KIR3DL1</i>        | -0.350 | ***   |
|                         | <i>KIR3DL2</i>        | -0.350 | ***   |
|                         | <i>KIR3DL3</i>        | -0.230 | ***   |
|                         | <i>KIR2DS4</i>        | -0.344 | ***   |
| B cell                  | <i>CD19</i>           | -0.184 | 0.011 |
|                         | <i>CD79A</i>          | -0.145 | 0.044 |

|                              |                      |        |        |
|------------------------------|----------------------|--------|--------|
| <b>Monocyte</b>              | <i>CD86</i>          | 0.564  | ***    |
|                              | <i>CD115 (CSF1R)</i> | 0.612  | ***    |
|                              | <i>PD1 (PDCD1)</i>   | -0.426 | ***    |
| <b>T cell<br/>exhaustion</b> | <i>CTLA4</i>         | -0.082 | 0.260* |
|                              | <i>LAG3</i>          | -0.001 | 1.000  |
|                              | <i>TIM3 (HAVCR2)</i> | 0.515  | ***    |

**Supplementary Table S5.** Correlation constants and p-values in Figure 6.

| Gene<br>markers                  | STAD  |                          |        |                          | LUAD  |                         |        |                          |
|----------------------------------|-------|--------------------------|--------|--------------------------|-------|-------------------------|--------|--------------------------|
|                                  | None  |                          | Purity |                          | None  |                         | Purity |                          |
|                                  | Cor   | P                        | Cor    | P                        | Cor   | P                       | Cor    | P                        |
| <i>CSF1</i>                      | 0.579 | 0 x 10 <sup>-00</sup>    | 0.551  | 1.79 x 10 <sup>-31</sup> | 0.376 | 0 x 10 <sup>-00</sup>   | 0.353  | 6.43 x 10 <sup>-16</sup> |
| <i>TGFβ1</i><br>( <i>TGFB1</i> ) | 0.596 | 3.37 x 10 <sup>-41</sup> | 0.577  | 5.60 x 10 <sup>-35</sup> | 0.458 | 0 x 10 <sup>-00</sup>   | 0.444  | 2.93 x 10 <sup>-25</sup> |
| <i>IL10</i>                      | 0.551 | 2.56 x 10 <sup>-34</sup> | 0.534  | 2.48 x 10 <sup>-29</sup> | 0.197 | 6.56X10 <sup>-6</sup>   | 0.177  | 7.95 x 10 <sup>-5</sup>  |
| <i>EBI3</i>                      | 0.43  | 0 x 10 <sup>-00</sup>    | 0.422  | 7.83 x 10 <sup>-18</sup> | 0.153 | 4.86 x 10 <sup>-4</sup> | 0.114  | 1.12 x 10 <sup>-2</sup>  |
